# Supplementary material
Source: PubMed Central journal article supplement (PMC11456361)
Supplement: NIHMS2023699-supplement-Supplementary_Table_1.pdf [file NIHMS2023699-supplement-Supplementary_Table_1.pdf]

**Supplementary Table 1 | Information of fibroblast and brain samples used in the study.**

| Sample ID            | Fibroblast ID | Genotype             | Disease         | Sex    | Sampling Age (yrs) | Disease Onset Age (yrs) | CAG   |
|----------------------|---------------|----------------------|-----------------|--------|--------------------|-------------------------|-------|
| Individual I Young   | AG10049       | Longitudinal Control | Healthy         | Male   | 48                 | N / A                   | NR    |
| Individual I Old     | AG16030       | Longitudinal Control | Healthy         | Male   | 68                 | N / A                   | NR    |
| Individual II Young  | AG10047       | Longitudinal Control | Healthy         | Male   | 53                 | N / A                   | NR    |
| Individual II Old    | AG14048       | Longitudinal Control | Healthy         | Male   | 71                 | N / A                   | NR    |
| Individual III Young | AG04456       | Longitudinal Control | Healthy         | Male   | 49                 | N / A                   | NR    |
| Individual III Old   | AG14251       | Longitudinal Control | Healthy         | Male   | 68                 | N / A                   | NR    |
| Young I              | GM03440       | Control              | Healthy         | Male   | 22                 | N / A                   | NR    |
| Young II             | GM00495       | Control              | Healthy         | Male   | 29                 | N / A                   | NR    |
| Young III            | AG11732       | Control              | Healthy         | Female | 24                 | N / A                   | NR    |
| Old I                | AG10047       | Control              | Healthy         | Male   | 53                 | N / A                   | NR    |
| Old II               | AG12956       | Control              | Healthy         | Male   | 50                 | N / A                   | NR    |
| Old III              | GM02187       | Control              | Healthy         | Female | 60                 | N / A                   | NR    |
| Ctrl.60              | G08379        | Control              | Healthy         | Female | 60                 | N / A                   | NR    |
| Ctrl.17              | GM02171       | Control              | Healthy         | Female | 22                 | N / A                   | 17    |
| HD.43                | ND30013       | HD                   | Symptomatic     | Male   | 54                 | 50                      | 43    |
| HD.45                | GM04230       | HD                   | Symptomatic     | Male   | 55                 | Not known               | 45    |
| HD.40                | ND33947       | HD                   | Symptomatic     | Female | 71                 | 63                      | 40    |
| HD.47                | GM04198       | HD                   | Symptomatic     | Female | 63                 | Not known               | 47    |
| HD.46                | GM04194       | HD                   | Symptomatic     | Female | 60                 | Not known               | 46    |
| HD.45b               | GM02147       | HD                   | Symptomatic     | Male   | 55                 | Not known               | 45    |
| Pre-HD.42            | GM04717       | HD                   | Pre-Symptomatic | Female | 44                 | 60                      | 42    |
| Pre-HD.45            | GM04861       | HD                   | Pre-Symptomatic | Male   | 16                 | 33                      | 45    |
| Pre-HD.40/50         | GM04857       | HD                   | Pre-Symptomatic | Female | 23                 | 28                      | 40/50 |
| Pre-HD.47            | GM04855       | HD                   | Pre-Symptomatic | Male   | 11                 | 26                      | 47    |
| Pre-HD.47b           | GM04829       | HD                   | Pre-Symptomatic | Female | 21                 | 34                      | 47    |

| Brain Samples                           | Region        | Age (yrs) | Sex    |
|-----------------------------------------|---------------|-----------|--------|
| Cognitively normal Individual I Young   | Human Stiatum | 23        | Female |
| Cognitively normal Individual II Young  | Human Stiatum | 35        | Female |
| Cognitively normal Individual III Young | Human Stiatum | 39        | Female |
| Cognitively normal Individual IV Young  | Human Stiatum | 36        | Female |
| Cognitively normal Individual I Old     | Human Stiatum | 69        | Female |
| Cognitively normal Individual II Old    | Human Stiatum | 74        | Female |
| Cognitively normal Individual III Old   | Human Stiatum | 78        | Female |
| Cognitively normal Individual IV Old    | Human Stiatum | 77        | Female |
