# Supplementary material
Source: PubMed Central journal article supplement (PMC11456361)
Supplement: NIHMS2023699-supplement-Supplementary_Table_2.pdf [file NIHMS2023699-supplement-Supplementary_Table_2.pdf]

| No.             | shRNA Clone ID | Gene ID   | Sytox % Plate A | Sytox % Plate B | Average Sytox % | t-test P-value |
|-----------------|----------------|-----------|-----------------|-----------------|-----------------|----------------|
| Control-HD      |                |           | 50.877          | 48.37           | 49.6235         | 1              |
| Control-Healthy |                |           | 26.841          | 24.534          | 25.6875         | 0.005026709    |
| 1               | TRCN0000256296 | RCAN1     | 26.559          | 30.944          | 28.7515         | 0.014327348    |
| 2               | TRCN0000236208 | RTCA      | 29.85           | 34.207          | 32.0285         | 0.019801152    |
| 3               | TRCN0000006310 | BRD2      | 38.232          | 26.578          | 32.405          | 0.101846397    |
| 4               | TRCN0000004121 | UBE2D4    | 34.607          | 33.743          | 34.175          | 0.007285374    |
| 5               | TRCN0000003981 | SRF       | 33.791          | 37.182          | 35.4865         | 0.021530228    |
| 6               | TRCN0000057779 | ITGA8     | 34.044          | 39.445          | 36.7445         | 0.049504935    |
| 7               | TRCN0000072274 | ACTL6A    | 38.658          | 35.864          | 37.261          | 0.022283133    |
| 8               | TRCN0000065215 | AP3S2     | 39.221          | 37.454          | 38.3375         | 0.017967901    |
| 9               | TRCN0000231932 | AK3       | 42.686          | 34.202          | 38.444          | 0.12732797     |
| 10              | TRCN0000029548 | ATP6V1B2  | 40.313          | 38.46           | 39.3865         | 0.022408318    |
| 11              | TRCN0000001051 | BCL2L11   | 44.83           | 33.944          | 39.387          | 0.208304657    |
| 12              | TRCN0000113925 | ARPM1     | 45.89           | 33.01           | 39.45           | 0.261138777    |
| 13              | TRCN0000003053 | STYXL1    | 42.167          | 37.745          | 39.956          | 0.062688518    |
| 14              | TRCN0000029404 | YWHAZ     | 43.31           | 37.308          | 40.309          | 0.103356565    |
| 15              | TRCN0000218823 | KLF15     | 43.54           | 38.426          | 40.983          | 0.093618034    |
| 16              | TRCN0000036119 | GSTZ1     | 37.137          | 44.855          | 40.996          | 0.167347807    |
| 17              | TRCN0000083775 | GSTP1     | 41.246          | 40.761          | 41.0035         | 0.021241237    |
| 18              | TRCN0000046368 | PYCR2     | 40.953          | 42.925          | 41.939          | 0.040474851    |
| 19              | TRCN0000306923 | DGCR14    | 42.515          | 41.376          | 41.9455         | 0.030682796    |
| 20              | TRCN0000048519 | TTL4      | 41.265          | 42.975          | 42.12           | 0.038542762    |
| 21              | TRCN0000008811 | GNG7      | 46.285          | 38.679          | 42.482          | 0.216444942    |
| 22              | TRCN0000014873 | RFX3      | 42.784          | 42.302          | 42.543          | 0.030996927    |
| 23              | TRCN0000013666 | RUNX1T1   | 44.286          | 41.129          | 42.7075         | 0.075454813    |
| 24              | TRCN0000039984 | REL       | 43.548          | 42.86           | 43.204          | 0.038639053    |
| 25              | TRCN0000137689 | FAN1      | 41.376          | 45.295          | 43.3355         | 0.113933244    |
| 26              | TRCN0000001554 | MAP3K7    | 47.221          | 40.219          | 43.72           | 0.253306577    |
| 27              | TRCN0000106710 | HIST1H2BK | 44.039          | 43.591          | 43.815          | 0.044850294    |
| 28              | TRCN0000038569 | SNUPN     | 43.936          | 44.074          | 44.005          | 0.046472772    |
| 29              | TRCN0000005142 | SPCS2     | 46.131          | 41.991          | 44.061          | 0.148290459    |
| 30              | TRCN0000299680 | CINP      | 43.491          | 45.256          | 44.3735         | 0.07570762     |
| 31              | TRCN0000033561 | BCL10     | 45.14           | 43.991          | 44.5655         | 0.066941939    |
| 32              | TRCN0000058107 | PSMD1     | 45.048          | 44.538          | 44.793          | 0.063517199    |
| 33              | TRCN0000064508 | FMO5      | 40.869          | 49.139          | 45.004          | 0.396948326    |
| 34              | TRCN0000043044 | ATP6V1H   | 46.826          | 43.967          | 45.3965         | 0.156235218    |
| 35              | TRCN0000057990 | CXCL16    | 45.088          | 45.96           | 45.524          | 0.090763259    |
| 36              | TRCN0000153028 | DYNLRB1   | 49.174          | 42.155          | 45.6645         | 0.39938845     |
| 37              | TRCN0000050684 | ACER2     | 47.118          | 44.222          | 45.67           | 0.175029979    |
| 38              | TRCN0000040079 | RPS6      | 49.096          | 42.34           | 45.718          | 0.391672738    |
| 39              | TRCN0000162130 | GSTT2     | 41.958          | 49.646          | 45.802          | 0.444341945    |
| 40              | TRCN0000276004 | SRP72     | 39.392          | 52.673          | 46.0325         | 0.648262688    |
| 41              | TRCN0000002857 | PTPRF     | 43.984          | 48.597          | 46.2905         | 0.331946042    |
| 42              | TRCN0000065138 | VPS26A    | 50.392          | 42.744          | 46.568          | 0.526972465    |
| 43              | TRCN0000047610 | RASL10B   | 47.114          | 46.028          | 46.571          | 0.155011555    |

|    |                |         |        |        |         |             |
|----|----------------|---------|--------|--------|---------|-------------|
| 44 | TRCN0000019384 | SMAD7   | 50.587 | 42.634 | 46.6105 | 0.544975122 |
| 45 | TRCN0000298602 | FEN1    | 45.93  | 47.435 | 46.6825 | 0.181934935 |
| 46 | TRCN0000039942 | PRKAR1A | 40.629 | 53.43  | 47.0295 | 0.7292685   |
| 47 | TRCN0000000494 | CDK9    | 52.041 | 42.053 | 47.047  | 0.666431472 |
| 48 | TRCN0000050350 | SUPV3L1 | 52.282 | 42.147 | 47.2145 | 0.689786685 |
| 49 | TRCN0000155446 | INO80B  | 44.366 | 50.146 | 47.256  | 0.530721237 |
| 50 | TRCN0000002493 | PPP2R2A | 40.594 | 54.007 | 47.3005 | 0.765929748 |
| 51 | TRCN0000134790 | FAM98B  | 53.331 | 41.286 | 47.3085 | 0.742845648 |
| 52 | TRCN0000289803 | ASNSD1  | 48.09  | 46.583 | 47.3365 | 0.258327747 |
| 53 | TRCN0000050614 | CNOT6   | 52.348 | 42.336 | 47.342  | 0.701625329 |
| 54 | TRCN0000218714 | STX5    | 47.153 | 47.656 | 47.4045 | 0.224760148 |
| 55 | TRCN0000052016 | DUSP16  | 51     | 44.122 | 47.561  | 0.629861684 |
| 56 | TRCN0000013713 | ATF2    | 49.264 | 45.954 | 47.609  | 0.434244926 |
| 57 | TRCN0000293218 | SNAPIN  | 44.362 | 50.869 | 47.6155 | 0.622840881 |
| 58 | TRCN0000059900 | XPOT    | 48.727 | 46.673 | 47.7    | 0.357110752 |
| 59 | TRCN0000273401 | SFRS7   | 47.605 | 48.027 | 47.816  | 0.290965051 |
| 60 | TRCN0000040171 | PPP2R2B | 42.639 | 53.039 | 47.839  | 0.770399386 |
| 61 | TRCN0000057054 | ZFYVE16 | 49.311 | 46.46  | 47.8855 | 0.456537062 |
| 62 | TRCN0000301019 | FANCL   | 47.709 | 48.18  | 47.9445 | 0.318654432 |
| 63 | TRCN0000167342 | ZCRB1   | 48.792 | 47.36  | 48.076  | 0.395922124 |
| 64 | TRCN0000289685 | TIPRL   | 49.662 | 47.182 | 48.422  | 0.565917995 |
| 65 | TRCN0000036472 | GNAI1   | 49.882 | 47.044 | 48.463  | 0.602335386 |
| 66 | TRCN0000029208 | PHB     | 45.181 | 51.859 | 48.52   | 0.786273726 |
| 67 | TRCN0000072471 | AIMP2   | 48.1   | 49.14  | 48.62   | 0.536643388 |
| 68 | TRCN0000350392 | TSKU    | 48.049 | 49.235 | 48.642  | 0.55243566  |
| 69 | TRCN0000059523 | ABCA7   | 54.928 | 42.505 | 48.7165 | 0.899303392 |
| 70 | TRCN0000010207 | VRK2    | 47.305 | 50.267 | 48.786  | 0.708077428 |
| 71 | TRCN0000047710 | RHOA    | 55.238 | 42.606 | 48.922  | 0.923193689 |
| 72 | TRCN0000234533 | CTNNA1  | 49.804 | 48.243 | 49.0235 | 0.723853502 |
| 73 | TRCN0000020601 | GTF2A2  | 47.188 | 50.861 | 49.0245 | 0.81287453  |
| 74 | TRCN0000057609 | CD81    | 50.395 | 47.954 | 49.1745 | 0.821444932 |
| 75 | TRCN0000011375 | LPAR2   | 51.97  | 46.603 | 49.2865 | 0.919803806 |
| 76 | TRCN0000049908 | CTDSP1  | 46.811 | 51.81  | 49.3105 | 0.921095069 |
| 77 | TRCN0000050500 | DDX1    | 49.444 | 49.274 | 49.359  | 0.852758381 |
| 78 | TRCN0000055478 | EGF     | 53.197 | 45.595 | 49.396  | 0.959839414 |
| 79 | TRCN0000037806 | PRKAR2A | 49.168 | 49.744 | 49.456  | 0.908299589 |
| 80 | TRCN0000016285 | MAFA    | 52.943 | 46.216 | 49.5795 | 0.99133259  |
| 81 | TRCN0000245286 | AHR     | 48.626 | 50.555 | 49.5905 | 0.985248049 |
| 82 | TRCN0000060433 | TSPO    | 49.519 | 49.807 | 49.663  | 0.977868828 |
| 83 | TRCN0000254745 | RNF169  | 52.752 | 46.701 | 49.7265 | 0.977765981 |
| 84 | TRCN0000165277 | INO80E  | 44.318 | 55.211 | 49.7645 | 0.982163488 |
| 85 | TRCN0000119048 | SBDS    | 48.49  | 51.679 | 50.0845 | 0.841316372 |
| 86 | TRCN0000001862 | TAB1    | 45.999 | 54.335 | 50.167  | 0.91204346  |
| 87 | TRCN0000084058 | MSH3    | 49.289 | 51.41  | 50.3495 | 0.701588642 |
| 88 | TRCN0000123212 | AHNAK   | 52.633 | 48.069 | 50.351  | 0.806167597 |
| 89 | TRCN0000072799 | TMED9   | 53.966 | 46.927 | 50.4465 | 0.846090542 |
| 90 | TRCN0000003411 | UBR5    | 45.697 | 55.25  | 50.4735 | 0.879180072 |
| 91 | TRCN0000006438 | TRIM27  | 51.321 | 49.689 | 50.505  | 0.615328704 |

|     |                |          |        |        |         |             |
|-----|----------------|----------|--------|--------|---------|-------------|
| 92  | TRCN0000160952 | EDC3     | 51.465 | 49.631 | 50.548  | 0.612054359 |
| 93  | TRCN0000046353 | QDPR     | 52.925 | 48.175 | 50.55   | 0.762997561 |
| 94  | TRCN0000274180 | TFDP1    | 48.676 | 52.628 | 50.652  | 0.703214939 |
| 95  | TRCN0000243383 | SRD5A3   | 51.27  | 50.169 | 50.7195 | 0.507376722 |
| 96  | TRCN0000141543 | TNKS1BP1 | 52.357 | 49.356 | 50.8565 | 0.592734561 |
| 97  | TRCN0000029148 | TMED10   | 52.7   | 49.036 | 50.868  | 0.631471564 |
| 98  | TRCN0000001309 | SFRS12   | 52.029 | 50.046 | 51.0375 | 0.469636395 |
| 99  | TRCN0000008024 | MYD88    | 54.348 | 47.811 | 51.0795 | 0.717845591 |
| 100 | TRCN0000333044 | TOPBP1   | 49.959 | 52.264 | 51.1115 | 0.474345417 |
| 101 | TRCN0000059064 | KISS1    | 57.004 | 45.285 | 51.1445 | 0.823334636 |
| 102 | TRCN0000152188 | BANF1    | 53.968 | 48.372 | 51.17   | 0.664056645 |
| 103 | TRCN0000160077 | EXOC4    | 56.831 | 45.73  | 51.2805 | 0.798322768 |
| 104 | TRCN0000002088 | ITCH     | 57.619 | 45.077 | 51.348  | 0.812695157 |
| 105 | TRCN0000113881 | VILL     | 51.196 | 51.585 | 51.3905 | 0.298260882 |
| 106 | TRCN0000296342 | LRIG1    | 47.706 | 55.268 | 51.487  | 0.685938716 |
| 107 | TRCN0000042923 | SLC12A1  | 57.792 | 45.184 | 51.488  | 0.799062254 |
| 108 | TRCN0000338481 | TWF1     | 52.393 | 51.061 | 51.727  | 0.276560135 |
| 109 | TRCN0000005226 | ACER3    | 54.957 | 48.823 | 51.89   | 0.56455733  |
| 110 | TRCN0000290470 | TNFRSF21 | 54.317 | 49.464 | 51.8905 | 0.493812004 |
| 111 | TRCN0000275836 | GCDH     | 55.812 | 48.009 | 51.9105 | 0.632921365 |
| 112 | TRCN0000083980 | COL5A2   | 52.903 | 51.077 | 51.99   | 0.266531508 |
| 113 | TRCN0000122317 | SNRNP48  | 54.316 | 49.838 | 52.077  | 0.439898991 |
| 114 | TRCN0000046564 | CYBRD1   | 49.495 | 54.688 | 52.0915 | 0.482192886 |
| 115 | TRCN0000369031 | FBXL3    | 53.958 | 50.383 | 52.1705 | 0.36364851  |
| 116 | TRCN0000019427 | NR4A1    | 49.626 | 54.891 | 52.2585 | 0.461525202 |
| 117 | TRCN0000057338 | HLA-B    | 58.815 | 45.726 | 52.2705 | 0.729574085 |
| 118 | TRCN0000083932 | EIF2B2   | 51.523 | 53.021 | 52.272  | 0.211388397 |
| 119 | TRCN0000289384 | C1GALT1  | 53.496 | 51.159 | 52.3275 | 0.255323146 |
| 120 | TRCN0000006074 | DGUOK    | 54.237 | 50.469 | 52.353  | 0.351067597 |
| 121 | TRCN0000007177 | DUSP7    | 57.495 | 47.258 | 52.3765 | 0.653483411 |
| 122 | TRCN0000019270 | SSRP1    | 53.281 | 51.487 | 52.384  | 0.215187354 |
| 123 | TRCN0000300438 | KIF2A    | 50.265 | 54.56  | 52.4125 | 0.378602298 |
| 124 | TRCN0000257126 | SF1      | 54.039 | 50.819 | 52.429  | 0.30291531  |
| 125 | TRCN0000150604 | SCAMP2   | 56.599 | 48.91  | 52.7545 | 0.519760682 |
| 126 | TRCN0000007197 | UBA7     | 48.031 | 58.523 | 53.277  | 0.568023536 |
| 127 | TRCN0000055850 | EFHA1    | 49.369 | 57.223 | 53.296  | 0.466983034 |
| 128 | TRCN0000057486 | CD2BP2   | 54.869 | 51.739 | 53.304  | 0.207845077 |
| 129 | TRCN0000233115 | HMGCR    | 54.719 | 51.924 | 53.3215 | 0.187669371 |
| 130 | TRCN0000134133 | C18orf55 | 59.029 | 47.641 | 53.335  | 0.589534849 |
| 131 | TRCN0000275310 | NR1H2    | 51.958 | 54.847 | 53.4025 | 0.186823267 |
| 132 | TRCN0000118815 | DTL      | 56.333 | 50.729 | 53.531  | 0.330984903 |
| 133 | TRCN0000373019 | MSTN     | 59.037 | 48.077 | 53.557  | 0.556535645 |
| 134 | TRCN0000365209 | MPI      | 50.929 | 56.293 | 53.611  | 0.310332968 |
| 135 | TRCN0000318424 | DNM1L    | 54.739 | 52.529 | 53.634  | 0.138446512 |
| 136 | TRCN0000062514 | CCT6A    | 59.611 | 47.664 | 53.6375 | 0.578337441 |
| 137 | TRCN0000037960 | PFKFB2   | 50.43  | 57.005 | 53.7175 | 0.364630876 |
| 138 | TRCN0000148073 | SASS6    | 57.65  | 49.859 | 53.7545 | 0.419018521 |
| 139 | TRCN0000231986 | DDX20    | 52.881 | 54.652 | 53.7665 | 0.114193268 |

|     |                |         |        |        |         |             |
|-----|----------------|---------|--------|--------|---------|-------------|
| 140 | TRCN0000055435 | CDK6    | 53.134 | 54.419 | 53.7765 | 0.098356566 |
| 141 | TRCN0000004058 | USP7    | 54.337 | 53.231 | 53.784  | 0.093482681 |
| 142 | TRCN0000276262 | SYBU    | 57.371 | 50.272 | 53.8215 | 0.380793825 |
| 143 | TRCN0000312701 | CDH2    | 54.226 | 53.418 | 53.822  | 0.085906951 |
| 144 | TRCN0000350299 | UBE2D2  | 55.168 | 52.605 | 53.8865 | 0.140499353 |
| 145 | TRCN0000003884 | PSMA4   | 53.889 | 54.1   | 53.9945 | 0.073774903 |
| 146 | TRCN0000158015 | ARID3B  | 54.349 | 53.678 | 54.0135 | 0.077367487 |
| 147 | TRCN0000194922 | MAP3K4  | 51.644 | 56.416 | 54.03   | 0.24368796  |
| 148 | TRCN0000060168 | SCG5    | 51.288 | 56.827 | 54.0575 | 0.282061138 |
| 149 | TRCN0000016819 | BPTF    | 58.186 | 50.088 | 54.137  | 0.398483361 |
| 150 | TRCN0000035199 | SULT1A2 | 57.384 | 51.019 | 54.2015 | 0.312625173 |
| 151 | TRCN0000139612 | TSNARE1 | 57.922 | 50.646 | 54.284  | 0.349518832 |
| 152 | TRCN0000072607 | CENPJ   | 53.255 | 55.489 | 54.372  | 0.105586128 |
| 153 | TRCN0000229628 | NDUFS3  | 55.392 | 53.459 | 54.4255 | 0.093639108 |
| 154 | TRCN0000232899 | SLC30A6 | 50.899 | 57.964 | 54.4315 | 0.328169824 |
| 155 | TRCN0000152655 | SNCAIP  | 57.439 | 51.598 | 54.5185 | 0.263407326 |
| 156 | TRCN0000382254 | STX18   | 58.59  | 50.597 | 54.5935 | 0.357236248 |
| 157 | TRCN0000022079 | ERCC3   | 59.941 | 49.542 | 54.7415 | 0.439595638 |
| 158 | TRCN0000025837 | DBT     | 55.118 | 54.697 | 54.9075 | 0.053280704 |
| 159 | TRCN0000047928 | RAN     | 57.802 | 52.236 | 55.019  | 0.219142587 |
| 160 | TRCN0000286980 | DDX17   | 57.293 | 52.797 | 55.045  | 0.169767582 |
| 161 | TRCN0000196400 | EIF2AK2 | 49.646 | 60.612 | 55.129  | 0.43087705  |
| 162 | TRCN0000380612 | STX2    | 57.261 | 53.133 | 55.197  | 0.147334399 |
| 163 | TRCN0000107186 | GADD45B | 56.179 | 54.338 | 55.2585 | 0.068440925 |
| 164 | TRCN0000010766 | HIPK2   | 59.186 | 51.331 | 55.2585 | 0.305042274 |
| 165 | TRCN0000046673 | IMMP2L  | 60.55  | 50.043 | 55.2965 | 0.403746463 |
| 166 | TRCN0000008759 | HSPA1B  | 58.749 | 51.899 | 55.324  | 0.258482953 |
| 167 | TRCN0000001111 | PTBP2   | 57.035 | 53.754 | 55.3945 | 0.107701798 |
| 168 | TRCN0000246164 | PAX6    | 55.447 | 55.421 | 55.434  | 0.043528051 |
| 169 | TRCN0000137596 | STAG3   | 58.512 | 52.583 | 55.5475 | 0.207045875 |
| 170 | TRCN0000037413 | SMG1    | 62.237 | 48.967 | 55.602  | 0.469350651 |
| 171 | TRCN0000048157 | SOS2    | 53.075 | 58.312 | 55.6935 | 0.17167744  |
| 172 | TRCN0000072475 | SNRPB   | 61.935 | 50.356 | 56.1455 | 0.385688387 |
| 173 | TRCN0000002538 | ENPP1   | 61.345 | 50.999 | 56.172  | 0.343655887 |
| 174 | TRCN0000003368 | UBE3A   | 62.642 | 50     | 56.321  | 0.40780876  |
| 175 | TRCN0000179155 | RQCD1   | 57.271 | 55.558 | 56.4145 | 0.04651806  |
| 176 | TRCN0000033434 | SIP1    | 59.403 | 53.517 | 56.46   | 0.166049487 |
| 177 | TRCN0000142193 | OBFC2B  | 57.511 | 55.418 | 56.4645 | 0.052526972 |
| 178 | TRCN0000147202 | SEC63   | 59.627 | 53.466 | 56.5465 | 0.172835136 |
| 179 | TRCN0000137724 | GAS8    | 59.631 | 53.67  | 56.6505 | 0.161835394 |
| 180 | TRCN0000027285 | ALDH4A1 | 53.738 | 59.58  | 56.659  | 0.157321001 |
| 181 | TRCN0000234318 | SMC3    | 56.401 | 57.208 | 56.8045 | 0.03202131  |
| 182 | TRCN0000000804 | CSK     | 60.578 | 53.111 | 56.8445 | 0.20817137  |
| 183 | TRCN0000274157 | STAT6   | 55.17  | 58.533 | 56.8515 | 0.074863265 |
| 184 | TRCN0000006150 | MAPK3   | 54.455 | 59.349 | 56.902  | 0.117966225 |
| 185 | TRCN0000000929 | NEK9    | 54.124 | 59.715 | 56.9195 | 0.14018073  |
| 186 | TRCN0000139639 | VDAC3   | 59.743 | 54.39  | 57.0665 | 0.128074535 |
| 187 | TRCN0000355889 | CCRN4L  | 60.495 | 53.761 | 57.128  | 0.17194001  |

|     |                |          |        |        |         |             |
|-----|----------------|----------|--------|--------|---------|-------------|
| 188 | TRCN0000127680 | TLL6     | 61.831 | 52.523 | 57.177  | 0.257593567 |
| 189 | TRCN0000315236 | PSPH     | 54.97  | 59.391 | 57.1805 | 0.096916633 |
| 190 | TRCN0000007558 | NFE2L2   | 58.099 | 56.409 | 57.254  | 0.037080233 |
| 191 | TRCN0000017379 | GTF2A1L  | 61.959 | 52.672 | 57.3155 | 0.250882723 |
| 192 | TRCN0000133817 | LRR6     | 55.388 | 59.256 | 57.322  | 0.079130344 |
| 193 | TRCN0000082856 | DDB1     | 56.981 | 57.664 | 57.3225 | 0.027314371 |
| 194 | TRCN0000078378 | RCL1     | 57.989 | 56.904 | 57.4465 | 0.029156851 |
| 195 | TRCN0000074496 | WDR83    | 56.104 | 58.829 | 57.4665 | 0.051459625 |
| 196 | TRCN0000002874 | PTPRK    | 58.51  | 56.539 | 57.5245 | 0.038397446 |
| 197 | TRCN0000073569 | HSPG2    | 59.126 | 56.023 | 57.5745 | 0.057552181 |
| 198 | TRCN0000074506 | TFIP11   | 58.035 | 57.176 | 57.6055 | 0.026468004 |
| 199 | TRCN0000002124 | PRKD1    | 62.687 | 52.586 | 57.6365 | 0.263484256 |
| 200 | TRCN0000164329 | GET4     | 61.415 | 53.914 | 57.6645 | 0.179031083 |
| 201 | TRCN0000082981 | HPS4     | 58.236 | 57.096 | 57.666  | 0.028086072 |
| 202 | TRCN0000279822 | PSMB6    | 55.945 | 59.508 | 57.7265 | 0.065271812 |
| 203 | TRCN0000029630 | ICAM1    | 63.375 | 52.35  | 57.8625 | 0.282340374 |
| 204 | TRCN0000299843 | DYNC1LI1 | 59.543 | 56.395 | 57.969  | 0.053508854 |
| 205 | TRCN0000034579 | GCAT     | 59.253 | 56.897 | 58.075  | 0.03901727  |
| 206 | TRCN0000123280 | FAR2     | 63.477 | 53.267 | 58.372  | 0.237965684 |
| 207 | TRCN0000151688 | EPB49    | 55.75  | 61.002 | 58.376  | 0.095034131 |
| 208 | TRCN0000236085 | HNRNPH1  | 58.83  | 57.923 | 58.3765 | 0.022416011 |
| 209 | TRCN0000072278 | PNN      | 53.71  | 63.531 | 58.6205 | 0.217843044 |
| 210 | TRCN0000161422 | XPO7     | 55.289 | 62.017 | 58.653  | 0.128336435 |
| 211 | TRCN0000312673 | DPM2     | 63.353 | 54.262 | 58.8075 | 0.190802521 |
| 212 | TRCN0000235134 | SMAD6    | 53.965 | 63.984 | 58.9745 | 0.211871602 |
| 213 | TRCN0000133815 | GBAS     | 57.245 | 60.755 | 59      | 0.049044956 |
| 214 | TRCN0000151080 | NUDT16   | 63.153 | 55.172 | 59.1625 | 0.150141766 |
| 215 | TRCN0000061134 | CHRNA5   | 58.539 | 59.794 | 59.1665 | 0.020903118 |
| 216 | TRCN0000051323 | GLS2     | 54.236 | 64.181 | 59.2085 | 0.202540017 |
| 217 | TRCN0000074743 | LSM7     | 61.52  | 57.223 | 59.3715 | 0.059373619 |
| 218 | TRCN0000288921 | TRIOBP   | 64.783 | 54.117 | 59.45   | 0.214719875 |
| 219 | TRCN0000005897 | TRIM5    | 62.602 | 56.361 | 59.4815 | 0.099332439 |
| 220 | TRCN0000015308 | SIX3     | 58.829 | 60.577 | 59.703  | 0.022221231 |
| 221 | TRCN0000119110 | LAMC1    | 59.409 | 60.015 | 59.712  | 0.015950311 |
| 222 | TRCN0000010040 | MAPK1    | 54.359 | 65.312 | 59.8355 | 0.210743681 |
| 223 | TRCN0000003343 | VEGFA    | 57.278 | 62.5   | 59.889  | 0.071205231 |
| 224 | TRCN0000376533 | FRG1     | 56.659 | 63.417 | 60.038  | 0.1017964   |
| 225 | TRCN0000078548 | PMS2     | 61.238 | 58.966 | 60.102  | 0.025086985 |
| 226 | TRCN0000035502 | ST3GAL6  | 62.021 | 58.739 | 60.38   | 0.03493464  |
| 227 | TRCN0000290697 | ACAT1    | 61.594 | 59.457 | 60.5255 | 0.022073069 |
| 228 | TRCN0000006203 | PHKG1    | 60.778 | 61.589 | 61.1835 | 0.01274075  |
| 229 | TRCN0000256946 | TIAM1    | 63.195 | 59.56  | 61.3775 | 0.033519046 |
| 230 | TRCN0000052766 | PPP4R1   | 61.82  | 61.193 | 61.5065 | 0.011617849 |
| 231 | TRCN0000235494 | PMS1     | 60.056 | 63.19  | 61.623  | 0.026844877 |
| 232 | TRCN0000116484 | TMPO     | 59.087 | 64.275 | 61.681  | 0.052625093 |
| 233 | TRCN0000155822 | PAM16    | 63.718 | 59.91  | 61.814  | 0.033234255 |
| 234 | TRCN0000051494 | PCSK1    | 66.473 | 57.501 | 61.987  | 0.117448889 |
| 235 | TRCN0000116593 | FRRS1    | 68.611 | 55.621 | 62.116  | 0.199552438 |

|     |                |        |        |        |         |             |
|-----|----------------|--------|--------|--------|---------|-------------|
| 236 | TRCN0000419423 | KLRG1  | 61.447 | 63.351 | 62.399  | 0.014842793 |
| 237 | TRCN0000046559 | RRM2B  | 66.245 | 59.885 | 63.065  | 0.059001888 |
| 238 | TRCN0000029504 | CCT5   | 64.62  | 62.041 | 63.3305 | 0.016781261 |
| 239 | TRCN0000026457 | GAPDHS | 63.771 | 64.153 | 63.962  | 0.007729495 |
| 240 | TRCN0000236265 | POLM   | 68.194 | 60.284 | 64.239  | 0.071988564 |
| 241 | TRCN0000128799 | STRA6  | 69.304 | 59.494 | 64.399  | 0.100084786 |
| 242 | TRCN0000064633 | CYP1A2 | 62.85  | 66.764 | 64.807  | 0.022635783 |
| 243 | TRCN0000013240 | LMO4   | 61.505 | 71.858 | 66.6815 | 0.085214233 |
| 244 | TRCN0000037745 | NME3   | 71.532 | 62.821 | 67.1765 | 0.060666581 |
| 245 | TRCN0000011092 | NXF1   | 68.902 | 72.497 | 70.6995 | 0.010638885 |
| 246 | TRCN0000372265 | FGL2   | 85.437 | 86.443 | 85.94   | 0.001380326 |
